# Supplementary material for: Controlled synthesis of trimetallic nitrogen-incorporated CoNiFe layered double hydroxide electrocatalysts for boosting the oxygen evolution reaction
Source: Royal Society of Chemistry journal article supplement (doi:10.1039/d2ra00919f), 2022-01-01
Supplement: d2ra00919f1.pdf [file d2ra00919f1.pdf]

# **Controlled synthesis of trimetallic nitrogen-incorporated CoNiFe layered double hydroxide electrocatalysts for boosting oxygen evolution reaction**

*Anh Thi Nguyet Nguyen, Minji Kim, and Jun Ho Shim\**

Department of Chemistry and Institute of Basic Science, Daegu University, Gyeongsan 38453,  
Republic of Korea

\*E-mail: [junhoshim@daegu.ac.kr](mailto:junhoshim@daegu.ac.kr)

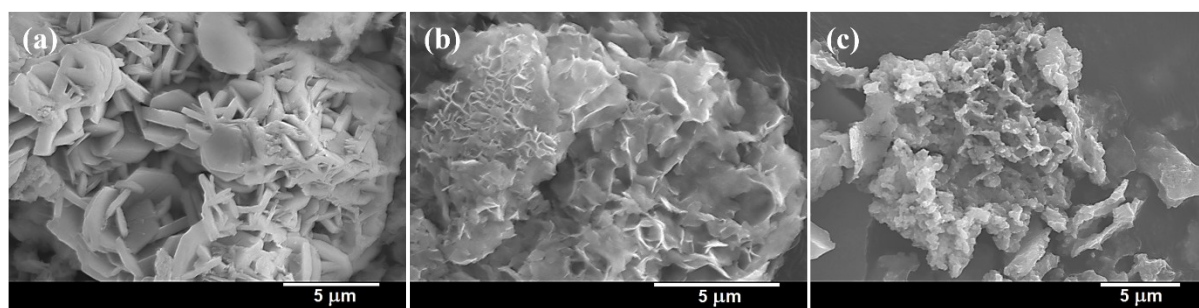

**Figure S1.** SEM images of monometallic (a) N-Co, (b) N-Ni, and (c) N-Fe.

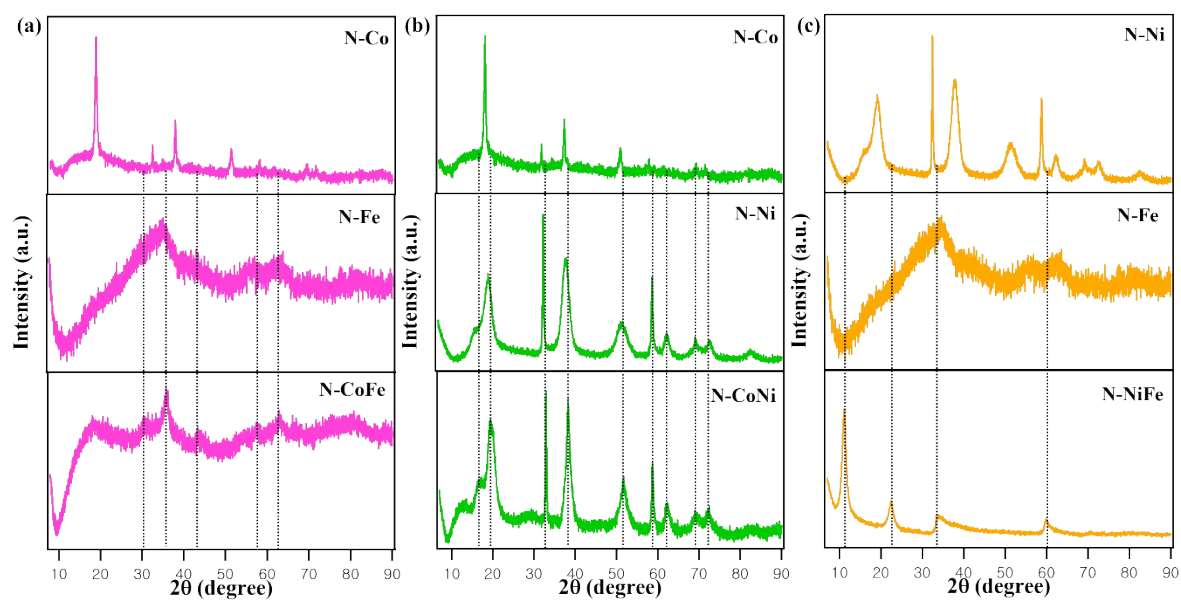

**Figure S2.** Comparison of XRD patterns; (a) N-Co, N-Fe, N-CoFe; (b) N-Co, N-Ni, N-CoNi; and (c) N-Ni, N-Fe, N-NiFe.

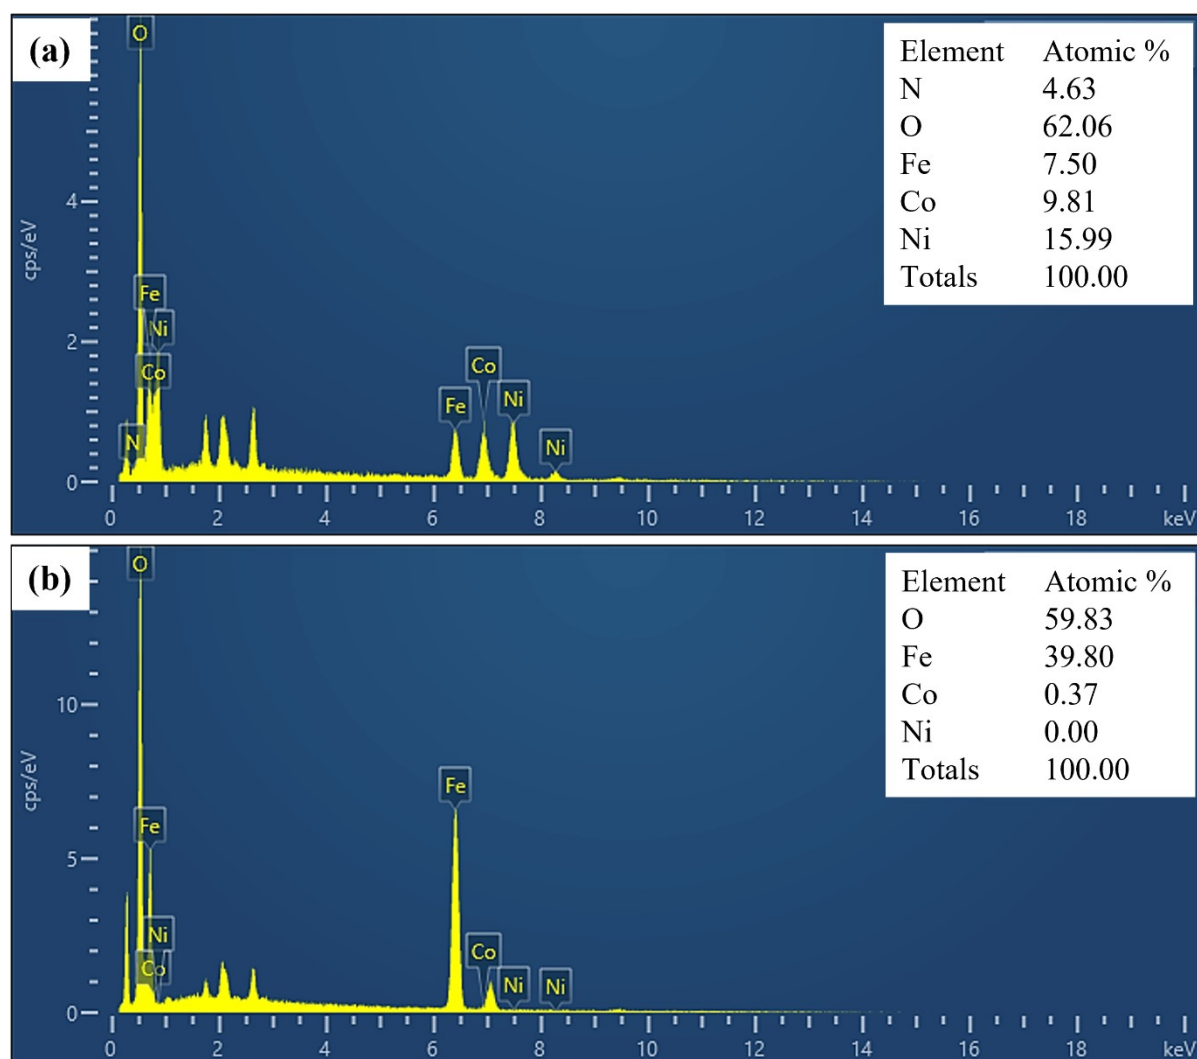

**Figure S3.** SEM-EDS analysis of (a) N-CoNiFe LDH and (b) CoNiFe.

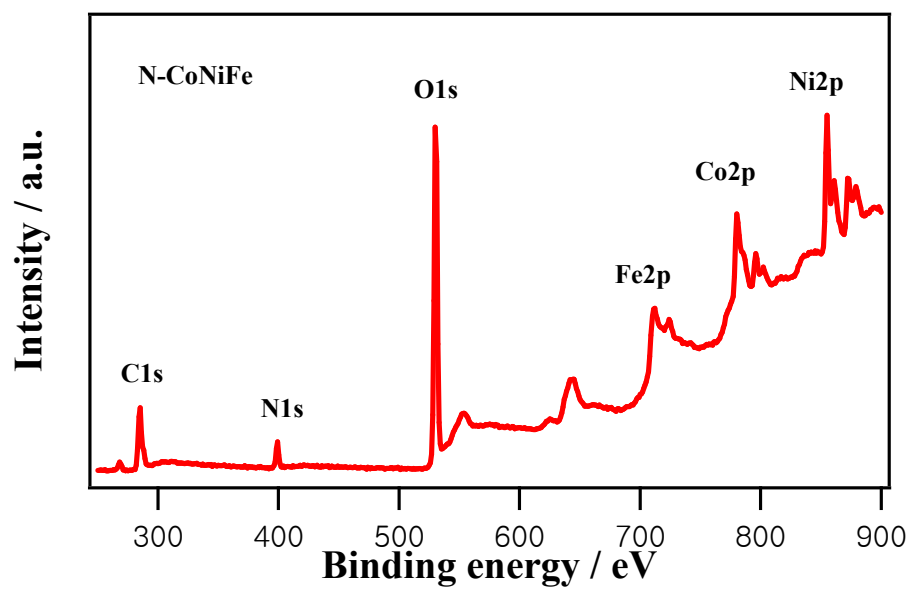

**Figure S4.** XPS survey scan of N-CoNiFe LDH catalyst.

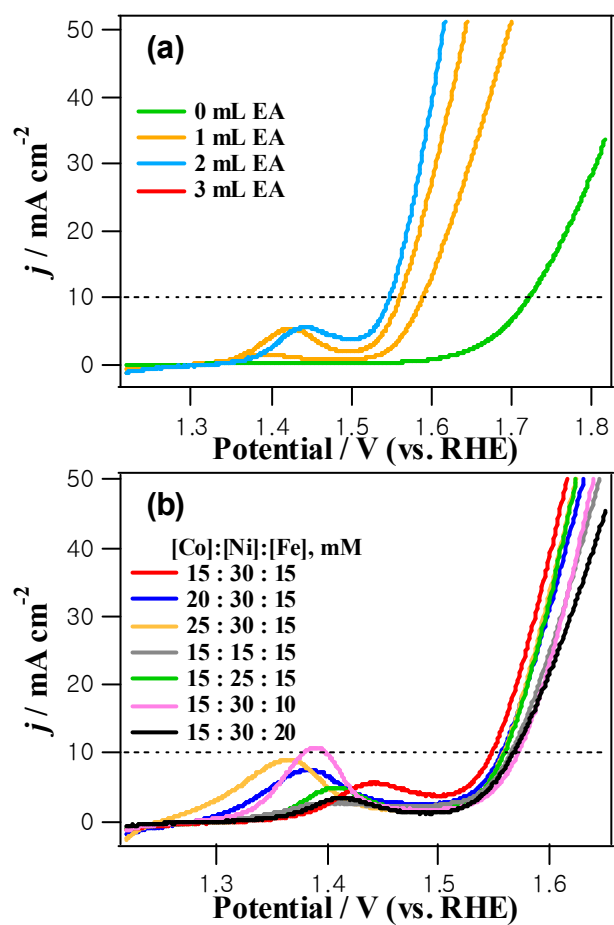

**Figure S5.** LSV curves in  $\text{O}_2$ -saturated 1.0 M KOH at a scan rate of  $10 \text{ mV s}^{-1}$  (rotational speed of 1600 rpm) of N-CoNiFe catalysts at various conditions: different (a) EA and (b) metal precursors ( $\text{Co}^{2+}$ ,  $\text{Ni}^{2+}$ , and  $\text{Fe}^{3+}$ ) concentrations.

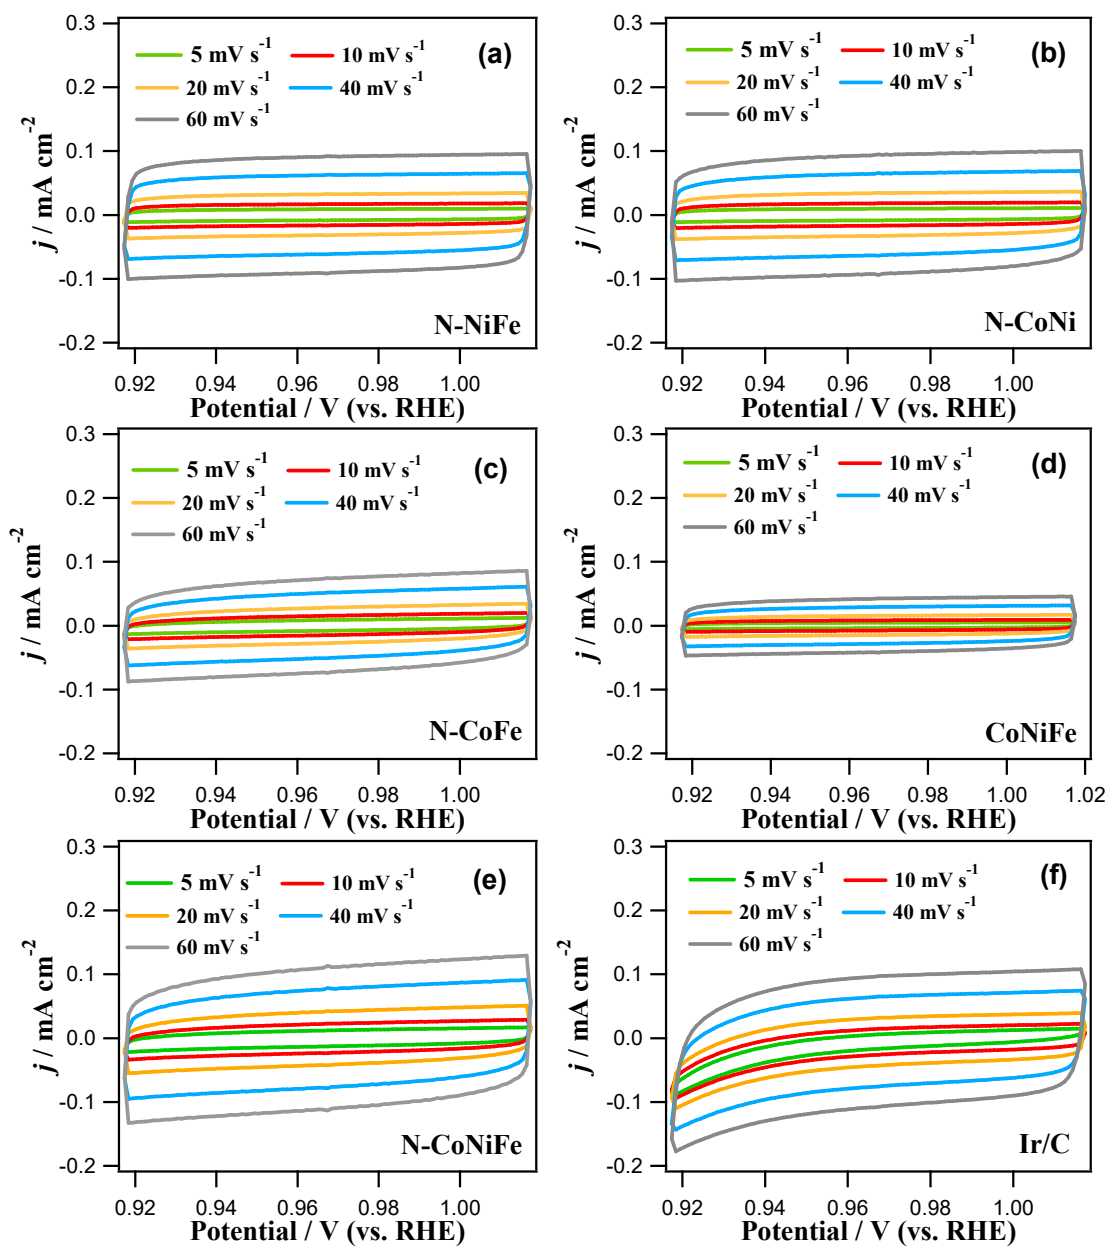

**Figure S6.** CV curves of (a) N-NiFe, (b) N-CoNi, (c) N-CoFe, (d) CoNiFe, (e) N-CoNiFe, and (f) Ir/C in 1.0 M KOH solution at different scan rates.

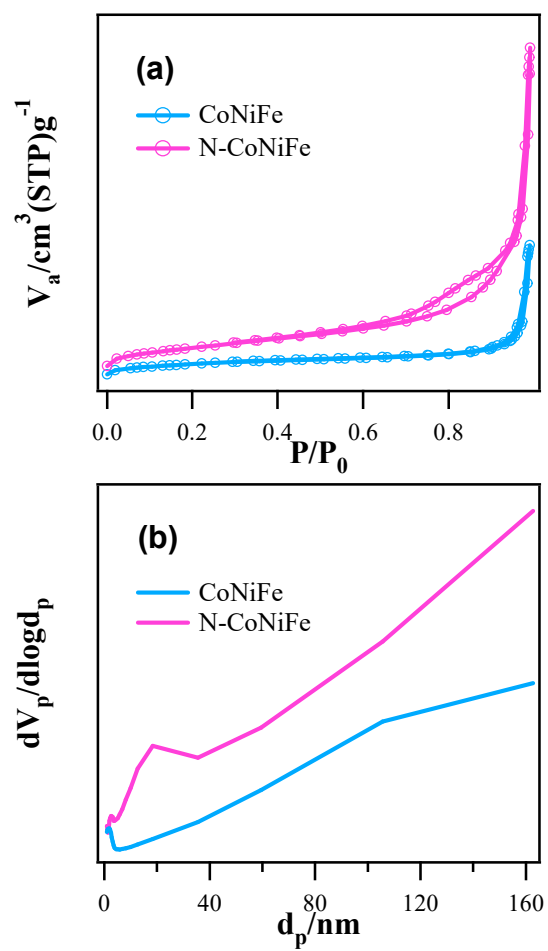

**Figure S7.** (a) BET surface areas and (b) pore-size distributions of an isothermal plot with  $\text{N}_2$  adsorption/desorption.

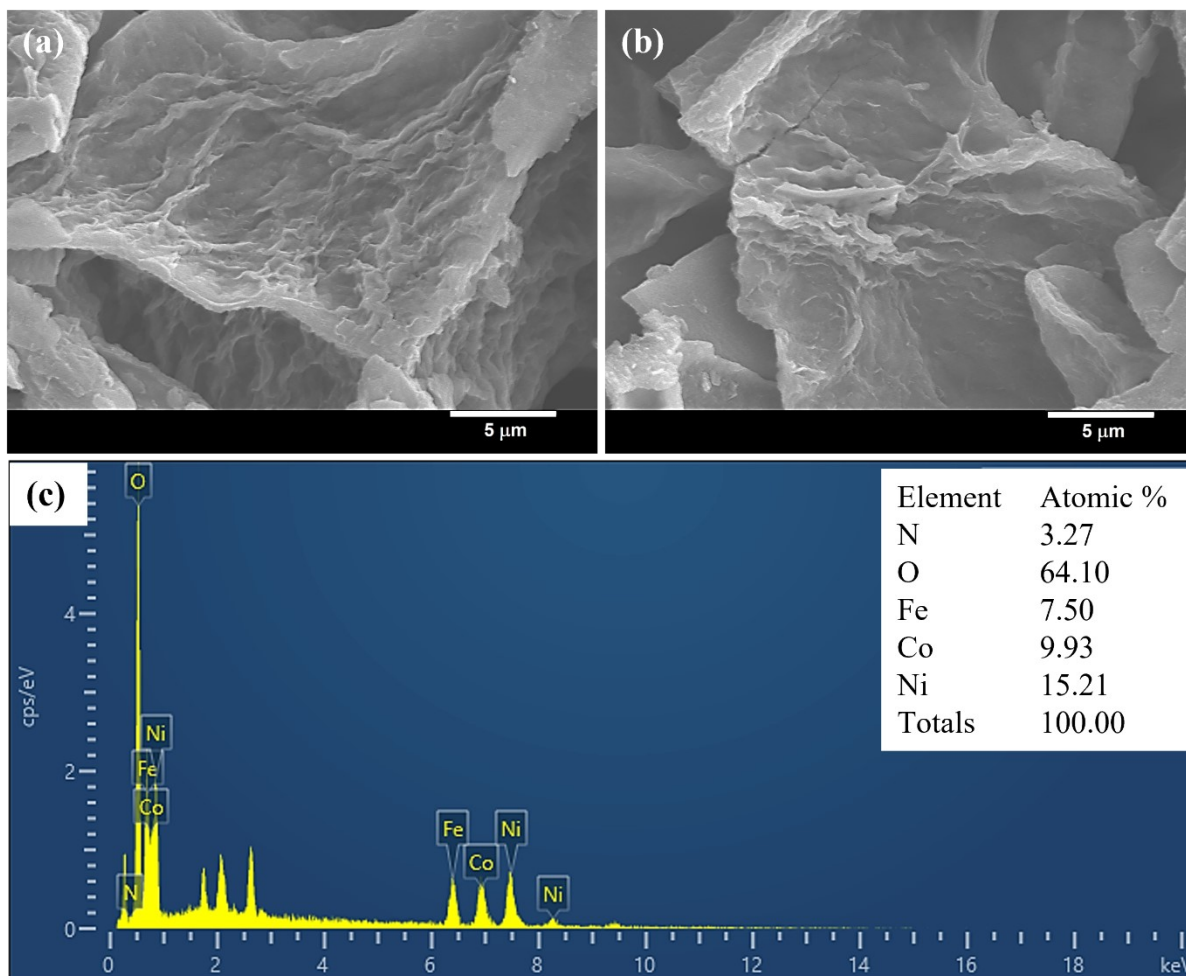

**Figure S8.** SEM images of N-CoNiFe LDH (a) before and (b) after stability test. (c) SEM-EDS analysis of N-CoNiFe LDH after stability test.



**Table S1.** Comparison of the OER catalytic performance for various CoNiFe-based catalysts in

| Electrode                                    | Synthesis method                                                                                              | Overpotential<br>@ 10 mA<br>cm <sup>-2</sup> | Tafel slope<br>(mV dec <sup>-1</sup> ) | Ref.                                                                         |
|----------------------------------------------|---------------------------------------------------------------------------------------------------------------|----------------------------------------------|----------------------------------------|------------------------------------------------------------------------------|
| N-CoNiFe<br>LDH/GC                           | reflux method                                                                                                 | 318 mV                                       | 72.2                                   | This work                                                                    |
| FeCoNi-<br>S@ZIF/GC                          | hydrothermal synthesis of<br>ZIF-67                                                                           | 420 mV                                       | NR                                     | <i>Mater. Today<br/>Energy</i> , 2020,<br><b>16</b> , 100405.                |
| P-CoNiFe/GC                                  | solvothermal process                                                                                          | 279 mV                                       | 62.9                                   | <i>Electrochim.<br/>Acta</i> , 2019, <b>318</b> ,<br>883-891.                |
| CoNiFe<br>LDH/stainless<br>steel             | electrodeposition                                                                                             | 196 mV                                       | 49                                     | <i>J. Alloys Compd.</i> ,<br>2021, <b>863</b> ,<br>158081.                   |
| CoNiFe<br>LDH/GC                             | dealloying process                                                                                            | 240.4 mV                                     | 38.6                                   | <i>ACS Sustainable<br/>Chem. Eng.</i> ,<br>2018, <b>6</b> , 16096-<br>16104. |
| CoNiFe<br>LTHs/GC                            | MOF-mediated method                                                                                           | 262 mV                                       | 88.1                                   | <i>J. Colloid<br/>Interface Sci.</i> ,<br>2021, <b>602</b> , 612-<br>618.    |
| CoNiFe-<br>OH/nickel<br>foam                 | electric-field assisted<br>alkaline hydrolysis-<br>oxidation strategy                                         | 207 mV                                       | 52.1                                   | <i>Small</i> , 2022, <b>18</b> ,<br>2104863.                                 |
| CoNiFeO <sub>x</sub> -<br>NC/carbon<br>paper | ion-exchange based<br>strategy                                                                                | 265 mV<br>(@ 50 mA<br>cm <sup>-2</sup> )     | 64.1                                   | <i>Appl. Catal. B-<br/>Environ.</i> , 2021,<br><b>287</b> , 119953.          |
| CoNiFe-<br>LDH/GC                            | chemical and structural<br>transformations of a<br>starting solid precursor $\alpha$ -<br>Co(OH) <sub>2</sub> | 291                                          | 59                                     | <i>ACS Appl.<br/>Energy Mater.</i> ,<br>2018, <b>1</b> , 4998-<br>5007.      |
| 2CoNiFe<br>LDH/nickel<br>foam                | electrodeposition                                                                                             | 224                                          | 41                                     | <i>Energy Technol.</i> ,<br>2021, <b>9</b> ,<br>2100688.                     |

alkaline medium.
